# 1 **Determinants of Healthcare Insurance Coverage among** 2 **Women of Reproductive Age in Tanzania: A Multilevel Mixed** 3 **Effect Analysis.**

4 Sanun Ally Kessy <sup>1\*</sup>†

5 Jovin R. Tibenderana <sup>1†</sup>

6 Jomo Gimonge<sup>2</sup>

7 Fabiola V Moshi<sup>2</sup>

8 <sup>1</sup> Department of Epidemiology and Biostatistics, Kilimanjaro Christian Medical University  
9 College, P. O. Box 2240 Moshi, Tanzania

10 <sup>2</sup> Department of Clinical Nursing, The University of Dodoma, Dodoma, Tanzania

11 \*Corresponding author: Sanun A Kessy, E-mail: [sahnunally@outlook.com](mailto:sahnunally@outlook.com)

12 † Authors contributed equally

## 13 **Abstract**

14 **Background:** Health insurance has been one of the fundamental approaches of financing  
15 healthcare for sustainable Development goals (SDGs). There is a paucity of evidence on the  
16 determinants of healthcare insurance coverage among women of reproductive age in Tanzania,  
17 therefore this study aimed at assessing factors associated with access to health care insurance  
18 among women of reproductive age in Tanzania using national Demographic and health survey  
19 dataset.

20 **Methodology:** This study was an analytical cross-sectional study that utilized nationally  
21 representative secondary data sourced from the Tanzania Demographic and Health Surveys

22 (TDHS) of 2022. A weighted sample of 15,254 women of reproductive age (15-49) was included  
23 in the study. A multilevel regression analysis was used to examine factors associated with  
24 health care insurance coverage. These results were presented using adjusted odds ratio (AOR)  
25 with a 95% confidence interval.

26 **Results:** In Tanzania the proportion of health insurance coverage among women of  
27 reproductive age was 5.8% whereby majority of women subscribing to employer's insurance  
28 (3.9%). Older women (35-49) were more likely to be covered with health insurance compared  
29 those aged 15-24 (AOR =2.75, 95% CI: 2.19, 3.45). Similarly, married women had higher  
30 likelihood of health insurance coverage compared to unmarried (AOR=1.60, 95% CI: 1.33,  
31 1.92). Furthermore, educated women were more likely to be covered with health insurance than  
32 uneducated women (AOR=6.96, 95% CI: 4.74, 10.22). Similarly, women who were exposed to  
33 mass media were more likely to be covered with health care insurance compared to unexposed  
34 (AOR=1.43, 95% CI: 1.14, 1.78).

35 **Conclusion:** Less than ten percent of Tanzanian women of reproductive age (WRA) are  
36 registered in health insurance, which is an unacceptably low coverage. This highlights the  
37 urgent need to eliminate barriers preventing this population's access to healthcare in order to  
38 achieve Standard Development Goals (SDGs) by 2030. The interplay of socioeconomic factors  
39 and access to information underscores the need for multifaceted approaches to enhance  
40 healthcare coverage among women of reproductive age in Tanzania.

41 **Keywords:** Health insurance, Women of reproductive age, determinants, universal health  
42 coverage, Tanzania.

## 43 **Background**

44 Globally, health insurance has been one of the fundamental approaches of financing healthcare  
45 for sustainable Development goals (SDGs) by 2030 (1). About 2 billion individuals are struggling

46 with financial difficulties, with 1 billion encountering severe out of pocket (1). Additionally, 344  
47 million people globally are being pushed further into the burden of the health care costs (1,2).  
48 Globally the significance of Universal Health Coverage (UHC) has been emphasized by its  
49 incorporation into the Sustainable Development Goals (SDGs) stating that, all individuals should  
50 have equal access to health care as right rather than a privilege with its target to be achieved by  
51 2030 (3,4).

52 Universal Health Coverage (UHC) means that all individuals and communities receive health  
53 services they need without suffering financial hardship. It includes the full spectrum of essential,  
54 quality health services, from health promotion to prevention, treatment, rehabilitation, and  
55 palliative care (2). The global trajectory is deviating from the path to achieve substantial  
56 advancements in universal health coverage, a goal outlined in the Sustainable Development  
57 Goals (SDGs) target 3.8 set for 2030 which aim at protecting the vulnerable population from  
58 financial risks associated with severe health-related expenses (5).

59 UHC is important as it ensures provision of essential health services based on need, equitable  
60 access for the entire population, and the presence of financial-risk protection mechanisms to  
61 prevent economic hardship from healthcare expenses are key components of universal health  
62 coverage (14). Women face considerable challenges in accessing medical services, primarily  
63 stemming from limited opportunities for economic empowerment and addressing their distinct  
64 healthcare requirements (5).

65 In Sub Saharan Countries, the prevalence of universal health coverage of health insurance  
66 coverage to be less than 10% (23,25). The outcomes of Health Insurance (HI) implementation  
67 have been varying. Findings from research in Ghana (17) and Rwanda (18) indicate that HI has  
68 contributed to greater equity in access to care for the overall population, alleviating the financial  
69 burden of healthcare expenses among the impoverished. Conversely, study findings from  
70 Ghana suggests Health Insurance (HI) did not provide uniform protection to all its members.

71 Instead, it favored individuals with higher education, greater wealth, and those living in proximity  
72 to health facilities more than others (19).

73 Furthermore, among Sub-Saharan countries there is a notable correlation between formal  
74 sector employment and access to health insurance compared to informal employment sector  
75 (20). Additionally, other factors such as such as income, education, household wealth status,  
76 marital status, age, and place of residence, as predictors of health insurance ownership (21,23).

77 Despite notable accomplishments, the healthcare sector grapples with substantial hurdles in  
78 striving to deliver high-quality care to all individuals, regardless of their financial capacity to  
79 afford services. Women encounter more pronounced obstacles in accessing critical healthcare  
80 services, including routine antenatal visits and childbirth services (5,26, 27).

81 In Tanzania, over 80% of the population continues to rely on out-of-pocket payments for  
82 accessing healthcare services, often resulting in significant financial burdens (6). Tanzania  
83 implemented health insurance initiatives in the mid-1990s, introducing the National Health  
84 Insurance Fund (NHIF) in 1996 and the Community Health Fund (CHF) in 2001. The CHF,  
85 designed for the informal and rural communities, operates on a voluntary basis, offering  
86 coverage for up to six family members through a fixed annual payment, other health insurances  
87 such as Social Health Insurance Benefit (SHIB) established as a benefit under the National  
88 Social Security Fund (NSSF) and the Community Health Fund (CHF) and Tiba Kwa Kadi (TIKA)  
89 (6,7).

90 The capacity of women in the reproductive age group to attain affordable health coverage and  
91 care carries significant societal implications and hinges on the economic well-being of both  
92 women and their families. Nevertheless, the accessibility of healthcare services for women in  
93 the reproductive age group remains limited in Low- and Middle-Income Countries (LMIC),  
94 primarily due to financial.

95 In Tanzania, universal health coverage is in line with government policy of improving maternal  
96 health among reproductive age in order to improve maternal morbidities and mortality, more  
97 than 90% of women of reproductive do not have any health insurance (10). Despite several  
98 studies that have been done in Tanzania which were small scale, thus there is still a paucity of  
99 national wide information regarding health insurance utilizations. Additionally, there is a notable  
100 absence of published literature addressing health insurance coverage in the country. Hence to  
101 address this gap, the present study aimed to evaluate the health insurance coverage and its  
102 associated factors among women in the reproductive age group in Tanzania utilizing data from  
103 the Demographic and Health Survey (DHS). The findings of this study offer valuable insights for  
104 health planners, program developers, and healthcare professionals, providing a foundation for  
105 enhancing financial protection and service utilization among women of reproductive age.

## 106 **Methodology**

### 107 **Study setting and period.**

108 The study made use of the 2022 Tanzania Demographic and Health Survey (TDHS) data, a  
109 countrywide cross-sectional survey carried out every five years(1). Tanzania, the largest country in  
110 East Africa, spans an area of 940,000 square kilometers, including 60,000 square kilometers of  
111 inland water. The study incorporated data from all regions of the United Republic of Tanzania As of  
112 2022, the estimated population of Tanzania stood at 61,741,120, with an annual population growth  
113 rate of 3.2% (2,3).

### 114 **Study design and data source.**

115 This study was an analytical cross-sectional study that utilized nationally representative secondary  
116 data sourced from the Tanzania Demographic and Health Surveys (TDHS) of 2022.The TDHS, is  
117 funded by the U.S Agency for International Development and implementation is carried out by the

118 Ministry of Health (MoH) in Tanzania Mainland and Zanzibar, as well as the National Bureau of  
119 Statistics (NBS), the Office of the Chief Government Statistician (OCGS), with technical support  
120 provided by ICF International (2–5).

## 121 Data collection procedure.

122 The data collection method of the surveys involves using a standardized questionnaire that is  
123 uniform across countries to gather information from women aged 15–49. The questionnaire is often  
124 translated into the primary local languages of the participating nations. According to the DHS, these  
125 translated questionnaires, along with the original English version, undergo pretesting in both  
126 English and the local dialect to ensure their accuracy. Subsequently, during the pretest phase, field  
127 workers engage in an interactive discussion of the questions, providing suggestions for  
128 improvements across all versions. After the field practice, a debriefing session is conducted with the  
129 pretest field personnel, and adjustments are made to the questionnaires based on the insights  
130 gained from this process(1).

## 131 Sampling procedure and size

132 The survey employed face-to-face questionnaire interviews and utilized a stratified design with  
133 multistage cluster sampling to gather information on various aspects such as population health  
134 status, neonatal mortality, health behaviors, nutritional status, family planning, and demographics.

135 In the initial stage, 629 clusters were identified, from which households were then selected. Among  
136 these clusters, 26 households were systematically chosen to be representative from each cluster,  
137 resulting in a total of 16,354 households included in the survey. Eligibility for inclusion was based on  
138 the presence of all women aged 15–49 years in the selected household on the night prior to the  
139 interview. Further details on the sampling procedure and design have been previously  
140 documented(1). A total of 15,254 women who had information on all the variables of interest were

141 included in the study (Table 1). We adhered to the guidelines provided by the Strengthening the  
142 Reporting of Observational Studies in Epidemiology (STROBE) statement when writing the  
143 manuscript(6).The DHS data is freely available for download at  
144 <https://dhsprogram.com/data/available-datasets.cfm>

## 145 Study variables.

146 The outcome variable of this study was health insurance coverage. This was from the question “are  
147 you covered by any health insurance?”. Response is coded as 0 = “No” and 1 = “Yes”. The  
148 explanatory variables were age of the woman, marital status, education, employment, residence,  
149 wealth index, head of household sex, head of household age, media exposure, visited by  
150 healthcare worker for past12 months and visited health facility for the past 12 months. Age was  
151 recorded as 15-24, 25-34 and 35-49. Marital status was categorized as married and unmarried.  
152 Wealth status was categorized as poor, middle, and rich. Education was classified into three  
153 categories: no education, primary education, secondary education, or higher education. A new  
154 variable of media exposure was generated from household has either tv or radio. Our generated  
155 study variables and coding were based on previous literature (7–10).

## 156 Statistical analysis

157 We used Stata software, version 18.0 (Stata Corporation, College Station, TX, USA) for all  
158 statistical analyses. Initial presentation of health insurance coverage was done using percentages  
159 to show the proportion of women covered. Subsequently, through cross-tabulation, we explored the  
160 distribution of health insurance coverage among various background characteristics. Before  
161 conducting the regression analysis, we assessed potential collinearity among the variables using  
162 the variance inflation factor (VIF). Results indicated minimal collinearity, with VIF values ranging  
163 from 1.44 to 1.45 and a mean of 1.61, suggesting no significant multicollinearity concerns. To  
164 investigate the factors linked with health insurance coverage, we employed multilevel binary logistic

165 analysis. This approach was chosen due to the complex survey design of the DHS, which involved  
166 a two-stage cluster sampling. Four models were utilized for analysis: Model 0: An empty model  
167 without any explanatory variables, Model I: Including individual-level factors, Model II: Incorporating  
168 community level factors and Model III: Considering all explanatory variables together. Crude and  
169 adjusted odds ratios (AOR) with corresponding 95% confidence intervals (CIs) were fit for each  
170 model. Both fixed and random effects were included in all models. Random effects represented the  
171 variation in health insurance coverage based on primary sampling unit (PSU), measured by the  
172 Intra-Cluster Correlation Coefficient (ICC). Fixed effects illustrated the relationship between  
173 explanatory variables and the outcome. Model fitness was evaluated using the Akaike Information  
174 Criterion (AIC), allowing us to determine how well each model fit the data. A significance level of  $p <$   
175 0.05 was used for all statistical tests. Furthermore, we weighed all analyses to account for  
176 disproportionate sampling and non-response.

## 177 Ethical clearance

178 Permission to download and utilize the data was obtained from the DHS Program/ICF International  
179 via <http://www.dhsprogram.com>. The data was strictly used for the current study's objectives.  
180 Extensive details regarding the methodology and ethical considerations of the DHS program can be  
181 found in the published reports of the Tanzania Demographic and Health survey(1,5).

## 182 RESULTS

### 183 Participants background characteristics.

184 Among 15,254 participants of this study, the mean (SD) age was 29.3(9.8). The overall health  
185 insurance coverage among women of reproductive age was about 6%. Health insurance coverage  
186 was prevalent (39.6%) among women aged 35+ years. Around half (51.0%) women who owned  
187 health insurance were married. The majority of women (68.8%) of study participants who were



188 covered with health insurance had secondary or higher education. A significant percent (68.8%) of  
189 participants who were insured were working. Slightly more than half (53.7%) of the study  
190 participants who owned health insurance were from rural areas (Table 1).

191 Most (80.8%) of women of reproductive age who owned health insurance were from rich  
192 household. The majority (67.1%) of women of reproductive age who were insured were living in  
193 household whose head was male. Almost half (47.7%) of the women who were insured were living  
194 in household whose head was aged 35-49 years of age. The majority (78.5%) of women who were  
195 insured had been exposed to media. Almost all (95.1%) of the insured women had been visited by  
196 field worker in the last 12 months. The majority (62.9%) of the study participants who are insured  
197 visited a health facility for the past 12 months (Table 1).

198 **Table 1:** Background characteristics and coverage of health insurance (Weighted)

| Variables                    | Covered with Health Insurance |                  | p-value |
|------------------------------|-------------------------------|------------------|---------|
|                              | Total (Percentage)            | Yes (Percentage) |         |
| N                            | 15,254 (100.0%)               | 888 (5.8%)       |         |
| <b>Age (years)</b>           |                               |                  |         |
| 15-24                        | 5,810 (38.1%)                 | 263 (29.6%)      | <0.001  |
| 25-34                        | 4,609 (30.2%)                 | 273 (30.8%)      |         |
| 35-49                        | 4,835 (31.7%)                 | 352 (39.6%)      |         |
| <b>Marital status</b>        |                               |                  |         |
| unmarried                    | 8,624 (56.5%)                 | 435 (49.0%)      | <0.001  |
| married                      | 6,630 (43.5%)                 | 452 (51.0%)      |         |
| <b>Education</b>             |                               |                  |         |
| No education                 | 2,450 (16.1%)                 | 39 (4.3%)        | <0.001  |
| Primary                      | 8,123 (53.3%)                 | 239 (26.9%)      |         |
| Sec/higher                   | 4,681 (30.7%)                 | 610 (68.8%)      |         |
| <b>Occupation</b>            |                               |                  |         |
| Not working                  | 5,452 (35.7%)                 | 277 (31.2%)      | 0.032   |
| Working                      | 9,802 (64.3%)                 | 610 (68.8%)      |         |
| <b>Residence</b>             |                               |                  |         |
| Urban                        | 5,446 (35.7%)                 | 476 (53.7%)      | <0.001  |
| Rural                        | 9,808 (64.3%)                 | 411 (46.3%)      |         |
| <b>Wealth index</b>          |                               |                  |         |
| Poor                         | 5,044 (33.1%)                 | 102 (11.4%)      | <0.001  |
| Middle                       | 2,880 (18.9%)                 | 69 (7.7%)        |         |
| Rich                         | 7,330 (48.1%)                 | 717 (80.8%)      |         |
| <b>Sex of household head</b> |                               |                  |         |
| Male                         | 10,918 (71.6%)                | 595 (67.1%)      | 0.017   |
| Female                       | 4,336 (28.4%)                 | 292 (32.9%)      |         |
| <b>Household head age</b>    |                               |                  |         |
| 15-24                        | 539 (3.5%)                    | 20 (2.2%)        | 0.089   |

|                                                 |                |             |        |
|-------------------------------------------------|----------------|-------------|--------|
| 25-34                                           | 3,245 (21.3%)  | 172 (19.4%) |        |
| 35-49                                           | 6,516 (42.7%)  | 423 (47.7%) |        |
| 50+                                             | 4,954 (32.5%)  | 273 (30.7%) |        |
| <b>Media Exposure</b>                           |                |             |        |
| No                                              | 6,653 (43.6%)  | 191 (21.5%) | <0.001 |
| Yes                                             | 8,601 (56.4%)  | 696 (78.5%) |        |
| <b>Visited by fieldworker in last 12 months</b> |                |             |        |
| No                                              | 14,781 (96.9%) | 844 (95.1%) | 0.017  |
| Yes                                             | 473 (3.1%)     | 43 (4.9%)   |        |
| <b>Visited health facility last 12 months</b>   |                |             |        |
| No                                              | 7,167 (47.0%)  | 329 (37.1%) | <0.001 |
| Yes                                             | 8,087 (53.0%)  | 558 (62.9%) |        |

---

199

200

201

202

203

204

## 205 Proportional of health insurance coverage.

206 In Tanzania the proportion of health insurance coverage among women of reproductive age is  
207 5.8%. The rest of the group are not covered with any health insurance (figure 1)

## 208 Specific types of health insurance coverage.

209 Figure 2 shows percentage of women with specific types of health insurance. Most of them (5.8%)  
210 have any insurance followed by employers' insurance (3.9%) and the lowest (0.2%) being social  
211 security insurance.

## 212 Determinants of health insurance coverage among Tanzanian 213 reproductive age women.

### 214 Fixed effect

215 Table 2, Model III presents determinants of health insurance coverage among Tanzanian  
216 reproductive age women. Older women (35-49) were more likely to be covered with health  
217 insurance compared to those aged 15-24 (AOR =2.75, 95% CI: 2.19, 3.45). Similarly, married  
218 women had higher likelihood of health insurance coverage compared to unmarried (AOR=1.60,  
219 95% CI: 1.33, 1.92). The odds of health insurance coverage were higher among educated women  
220 (secondary/higher) compared to uneducated women (AOR=6.96, 95% CI: 4.74, 10.22). Women  
221 who were exposed to media had higher odds of health insurance coverage compared to unexposed  
222 (AOR=1.43, 95% CI: 1.14, 1.78). Women of reproductive age who visited health facility for the past  
223 12 months had higher likelihood of health insurance coverage compared to those who didn't  
224 (AOR=1.28, 95% CI: 1.09, 1.51). Additionally, participants from rich households were more likely to  
225 be covered with health insurance compared to their counterparts (AOR=2.78, 95% CI: 1.99, 3.87).  
226 We found that women who are living in households lead by female.

## 227 Random effect

228 Table 2 presents results for random effect. We observed that the Intra-Cluster Correlation (ICC)  
229 value in Model III was 0.27 indicating that approximately 27% of the variability in health insurance  
230 coverage is attributed to differences between the clusters. The cluster-level variation, as indicated  
231 by the ICC values were 29%, 26%, 24% and 27% for Model 0, Model I, Model II and Model III  
232 respectively. We opted to focus on interpreting the results of Model III for discussion, as it had the  
233 lowest AIC value (5603.60) among the models, indicating a goodness of fit.

234 **Table 2:** Multilevel analysis of determinants of health insurance coverage among reproductive age women in Tanzania (N= 15,254)

| Variable                                     | Model 0 | Model I              | Model II         | Model III            |
|----------------------------------------------|---------|----------------------|------------------|----------------------|
|                                              |         | AOR (95% CI)         | AOR (95% CI)     | AOR (95% CI)         |
| <b>Age (years)</b>                           |         |                      |                  |                      |
| 15-24                                        |         | 1                    |                  | 1                    |
| 25-34                                        |         | 1.41*(1.14, 1.74)    |                  | 1.30* (1.05,1.61)    |
| 35-49                                        |         | 3.12*** (2.49, 3.90) |                  | 2.75*** (2.19,3.45)  |
| <b>Marital status</b>                        |         |                      |                  |                      |
| unmarried                                    |         | 1                    |                  | 1                    |
| married                                      |         | 1.41*** (1.19, 1.68) |                  | 1.60*** (1.33,1.92)  |
| <b>Education</b>                             |         |                      |                  |                      |
| No education                                 |         | 1                    |                  | 1                    |
| Primary                                      |         | 1.91**(1.32, 2.74)   |                  | 1.57**(1.08,2.27)    |
| Sec/higher                                   |         | 9.91*** (6.8, 14.39) |                  | 6.96*** (4.74,10.22) |
| <b>Occupation</b>                            |         |                      |                  |                      |
| Not working                                  |         | 1                    |                  | 1                    |
| Working                                      |         | 1.02(0.86, 1.21)     |                  | 0.98(0.82,1.17)      |
| <b>Media Exposure</b>                        |         |                      |                  |                      |
| No                                           |         | 1                    |                  | 1                    |
| Yes                                          |         | 2.02*** (1.67, 2.46) |                  | 1.43**(1.14,1.78)    |
| <b>Visited by fieldworker in last months</b> |         |                      |                  |                      |
| No                                           |         | 1                    |                  | 1                    |
| Yes                                          |         | 1.29(0.89, 1.86)     |                  | 1.27(0.88,1.84)      |
| <b>Visited health facility last months</b>   |         |                      |                  |                      |
| No                                           |         | 1                    |                  | 1                    |
| Yes                                          |         | 1.28*(1.09, 1.51)    |                  | 1.28**(1.09,1.51)    |
| <b>Residence</b>                             |         |                      |                  |                      |
| Urban                                        |         |                      | 1                | 1                    |
| Rural                                        |         |                      | 0.97(0.75, 1.25) | 1.00(0.76,1.33)      |
| <b>Wealth index</b>                          |         |                      |                  |                      |
| Poor                                         |         |                      | 1                | 1                    |
| Middle                                       |         |                      | 1.20(0.86, 1.69) | 0.83(0.58,1.17)      |

|                              |          |          |                      |                     |
|------------------------------|----------|----------|----------------------|---------------------|
| Rich                         |          |          | 6.19*** (4.67, 8.21) | 2.78*** (1.99,3.87) |
| <b>Sex of household head</b> |          |          |                      |                     |
| Male                         |          |          | 1                    | 1                   |
| Female                       |          |          | 1.24*** (1.06, 1.45) | 1.42*** (1.19,1.70) |
| <b>Random effect</b>         |          |          |                      |                     |
| ICC (%)                      | 29%      | 26%      | 24%                  | 27%                 |
| Wald Chi-square              |          | 524.55   | 260.83               | 573.75              |
| Mean VIF                     |          | 1.45     | 1.44                 | 1.61                |
| <b>Model fitness</b>         |          |          |                      |                     |
| Log-likelihood               | -3144.76 | -2837.71 | -2991.92             | -2786.80            |
| AIC                          | 6293.52  | 5697.43  | 5995.83              | 5603.60             |
| N                            | 15,254   | 15,254   | 15,254               | 15,254              |
| Number of clusters           | 628      | 628      | 628                  | 628                 |

235 AOR = adjusted odds ratios; CI = Confidence Interval; \*p < 0.05, \*\*p < 0.01, \*\*\*p < 0.001; 1 = Reference category; ICC = Intra-Class

236 Correlation coefficient ; AIC = Akaike Information Criterion; N= Total sample size

## 237 Discussion

238 This study aimed to analyze the determinants affecting the possession of health insurance among  
239 Tanzanian women as a key approach to achieving universal health coverage. It found that  
240 insignificant majority of women of about 5.8 % own any form of health insurance. The research  
241 identified several factors associated with health insurance coverage, including age, economic  
242 status, educational attainment, marital status, and mass media exposure, Visited health facility last  
243 12 months.

244 Our study revealed that only 5.8% of Tanzanian women possess health insurance, figure is  
245 contrary with Ghana having more than half percent accessing health healthcare (34). These  
246 findings are in line with less than one tenth of the women of the reproductive age in Mauritania,  
247 Ethiopia and Nigeria. (25,33,35). This disparity can be explained that in Ghana there is a  
248 difference in health policy agendas, like livelihood empowerment against Poverty Program  
249 (LEAP) in Ghana (34) A pro-poor intervention policy, use of Participatory welfare ranking (PWR)  
250 and geographic targeting (GT) for poor groups helped in improving efficiency and equity needs  
251 under NHIS program in Ghana. It has been mandatory and compulsory for all Ghanaians to join  
252 health insurance scheme in Ghana (34).

253 This study found that compared to being unmarried, being married was associated with having  
254 health insurance coverage. This suggests that having a partner or spouse is beneficial,  
255 potentially because of the financial support from being in a dual-income household, which offers  
256 more avenues for acquiring health insurance. Similar findings have been reported in other  
257 studies conducted in East Africa, Zambia and Kenya (13,23,36) but inconsistency with the study  
258 done in Malawi (4). Additionally, unmarried women may struggle to afford insurance premiums  
259 and deductibles and may perceive their risk of illness as lower (23).



260 The study suggests that women 35 years of age and older are more likely to subscribe to  
261 healthcare insurance, which is in line with findings from several other African nations, such as  
262 South Africa, and Nigeria and the one done in sub-Saharan Africa (5,20,37). There are several  
263 reasons for this trend. Firstly, people in this age group typically find employment, which makes it  
264 possible for them to pay for health insurance. Furthermore, older women may have more  
265 children who are more likely to become sick and frequently take on caregiving responsibilities,  
266 which may lead them to look into insurance to reduce their out-of-pocket costs.

267 Women's education level had a substantial impact on whether or not they had health insurance.  
268 Individuals with more educational attainment were shown to be more likely than those without  
269 formal education to have health insurance. This finding adheres to other studies that show  
270 education is a significant factor in predicting one's ability to obtain health insurance (34,38–40).  
271 Education may help people obtain information more easily and increase their chances of  
272 entering high-paying professions, which are more likely to offer insurance coverage, which  
273 explains the positive association.

274 In comparison to women residing in the poor household, the current study showed that women  
275 residing in the rich household had greater odds of having health insurance coverage. The  
276 findings of the national survey carried out in Ethiopia were consistent with these results (41),  
277 indicating a relationship between income levels and the probability of acquiring health  
278 insurance. In contrast, women from wealthier homes had lower probabilities of having health  
279 insurance coverage, according to different research conducted in Sudan (42).

280 The observed phenomenon of women with a history of visiting health facilities in the last 12  
281 months exhibiting higher odds of having insurance coverage compared to their counterparts can  
282 be attributed to several factors. It is plausible that frequent visits to health facilities provide these  
283 women with increased exposure to healthcare services, thereby fostering a deeper  
284 understanding of the importance of insurance coverage and potentially reducing the barrier of

285 out-of-pocket expenses. This finding aligns with existing research conducted in East African  
286 countries (23).

287 Furthermore, compared to women who were not exposed to the media, those who were  
288 exposed showed a higher likelihood to use health insurance. This finding is consistent with  
289 research from Ethiopia, Kenya, and Sub-Saharan Africa (34,43,44). this can be explained by  
290 high coverage of internet and other media channel in the country which can act as an  
291 instrument for knowledge dissemination and raises awareness of the importance of health  
292 insurance.

## 293 **Strength and limitation**

294 The most current nationwide data set was used in the present study. In addition, Furthermore,  
295 the study adds to the body of knowledge regarding health insurance ownership among  
296 reproductive-age women. In this regard, demographic and health surveys serve as an essential  
297 resource for bridging the data gap and enabling evidence-based population health planning and  
298 intervention in the recipient nation. Furthermore, the datasets are nationally representative and  
299 had a sizable sample size. As such, the results can be generalized to the total female  
300 population. It is important to admit limitations.

301 Due to the secondary source nature of the data analysis, it is possible that additional variables  
302 or factors that could have affected health insurance coverage but were not included in the study  
303 because they were not included in the DHS dataset existed. Furthermore, drawing conclusions  
304 about causality is limited by the DHS's cross-sectional design. Self-reports were also used for  
305 collecting data. As a result, biases in social desirability and recall may affect the results.

## 306 **Conclusion**

307 Less than ten percent of Tanzanian women of reproductive age (WRA) are registered in health  
308 insurance, which is an unacceptably low coverage. This highlights the urgent need to eliminate  
309 barriers preventing this population's access to healthcare. The following stand out as important  
310 variables influencing health insurance coverage: marital status, wealth, level of education,  
311 media exposure, and recent medical facility visits.

312 The complicated interactions between socioeconomic and informational factors when making  
313 healthcare decisions among WRA in Tanzania are highlighted by these findings. Multifaceted  
314 approaches are essential to effectively increase coverage. Initiatives aimed at empowering  
315 women economically, such microfinance and income-generating businesses, can increase their  
316 ability to pay insurance costs.

317 In a similar way, encouraging educational attainment especially in the areas of health and  
318 finance through comprehensive education initiatives and chances for vocational training will  
319 enable WRA to make knowledgeable decisions on health insurance. Interventions should also  
320 prioritize the empowerment of widows and single women by ensuring them access to resources  
321 and the freedom to make their own decisions. Moreover, using mass media platforms to spread  
322 knowledge about health insurance advantages may also be crucial in raising WRA awareness  
323 and adoption. Policymakers and other stakeholders should take note of these observations as  
324 Tanzania works to achieve universal health coverage. These interventions should be focused  
325 on addressing the root causes of the problem and ensuring that all population segments have  
326 fair access to basic healthcare services.

## 327 **Acknowledgments**

328 The authors are grateful to MEASURE DHS for providing them with the data set.

## 329 **Funding**

330 This research did not receive any specific grant from funding agencies in the public,  
331 commercial, or not-for-profit sectors.

## 332 **Disclosure**

333 The authors report no conflicts of interest in this work.

## 334 **Abbreviations**

335 AIC; Akaike Information Criteria; BIC, Bayesian Information Criteria CI, Confidence Interval;  
336 CHF, community health fund; DHS; Demographic and Health Survey; EA; Enumeration Area;  
337 HI, Health Insurance; LMIC, Low and Middle Income Country; NBS, National Bureau of  
338 Statistics; NSSF, National Social Security Fund; PR, Prevalence Risk; PSU, Primary Sampling  
339 Unit; SDGs, Sustainable development goals; UHC, Universal health coverage; VIF, Variance  
340 Inflation Factor; TIKA, Tiba Kwa Kadi; SHIB, Social Health Insurance Benefit; WRA, Women of  
341 Reproductive Age; TDHS, Tanzania Demographic and Health Survey.

## 342 **Authorship contributions**

343 Sanun Ally Kessy and Jovin R Tibenderana: Conceptualization, Data curation, Formal analysis,  
344 Methodology, Visualization, Writing – original draft, Writing – review & editing. Jomo Gimonge:  
345 Writing – original draft, Writing – review & editing, Visualization. Fabiola Moshi: Writing – review  
346 & editing, Supervision.

## 347 **REFERENCE**

- 348 1. WHO. Universal health coverage (UHC) [Internet]. 2023 [cited 2024 Feb 5]. Available from:  
349 [https://www.who.int/news-room/fact-sheets/detail/universal-health-coverage-\(uhc\)](https://www.who.int/news-room/fact-sheets/detail/universal-health-coverage-(uhc))
- 350 2. Sambo LG, Kirigia JM. Investing in health systems for universal health coverage in Africa.

- 351 2014;1–22.
- 352 3. Burden G, Health D, Collaborator F. Trends in future health financing and coverage : future  
353 health spending and universal health coverage in 188 countries ., 2016;
- 354 4. Chauluka M, Uzochukwu BSC, Chinkhumba J. Factors Associated With Coverage of Health  
355 Insurance Among Women in. 2022;2(May):1–11.
- 356 5. Shao L, Wang Y, Wang X, Id LJ, Huang R. Factors associated with health insurance  
357 ownership among women of reproductive age : A multicountry study in sub-Saharan Africa.  
358 2022;1–12. Available from: <http://dx.doi.org/10.1371/journal.pone.0264377>
- 359 6. Kessy SA, Tibenderana JR. Reimagining of health care : Tanzania ' s quest and bold step  
360 towards universal health coverage deploying universal health insurance as a catalyst. Int J  
361 Surg Glob Heal. 2023;6(e0256):1–2.
- 362 7. Amani PJ, Hurtig A karin, Frumence G, Kiwara AD, Goicolea I, Sebastian MS. Health  
363 insurance and health system ( un ) responsiveness : a qualitative study with elderly in rural  
364 Tanzania. 2021;2:1–11.
- 365 8. Kapologwe NA, Meara JG, Kengia JT, Sonda Y, Gwajima D, Alidina S, et al. Development  
366 and upgrading of public primary healthcare facilities with essential surgical services  
367 infrastructure: A strategy towards achieving universal health coverage in Tanzania. BMC  
368 Health Serv Res. 2020;20(1):1–14.
- 369 9. MoHSW. United Republic of Tanzania, Health Sector Strategic Plan (HSSP IV): Reaching all  
370 Households with Quality Health Care. July 2015 – June 2020. 2015;2020(June). Available  
371 from: [https://www.childrenandaids.org/Tanzania\\_Health-Sector-Strategic-Plan\\_2015](https://www.childrenandaids.org/Tanzania_Health-Sector-Strategic-Plan_2015)
- 372 10. Demographic and Health Surveys. Demographic and Health Survey and Malaria Indicator  
373 Survey (TDHS-MIS). 2022.

- 374 11. Finkelstein A, Taubman S, Wright B, Bernstein M, Gruber J, Newhouse JP, et al. The Oregon  
375 Health Insurance Experiment: . Q J Econ [Internet]. 2012;127(3):1057–106. Available from:  
376 [http://qje.oxfordjournals.org/content/127/3/1057.short%5Cnpapers3://publication/uuid/E87C5](http://qje.oxfordjournals.org/content/127/3/1057.short%5Cnpapers3://publication/uuid/E87C59AE-C898-4AEB-B56C-53B1FD72EE63)  
377 [9AE-C898-4AEB-B56C-53B1FD72EE63](http://qje.oxfordjournals.org/content/127/3/1057.short%5Cnpapers3://publication/uuid/E87C59AE-C898-4AEB-B56C-53B1FD72EE63)
- 378 12. Shudura E, Yoseph A, Tamiso A. Utilization and Predictors of Maternal Health Care Services  
379 among Women of Reproductive Age in Hawassa University Health and Demographic  
380 Surveillance System Site, South Ethiopia: A Cross-Sectional Study. Adv Public Heal.  
381 2020;2020.
- 382 13. Kimani JK, Ettarh R, Warren C, Bellows B. Determinants of health insurance ownership  
383 among women in Kenya : evidence from the 2008 – 09 Kenya demographic and health  
384 survey. Int J equity Heal Heal. 2014;13(27):1–8.
- 385 14. Saksena P, Hsu J, Evans DB. Financial Risk Protection and Universal Health Coverage:  
386 Evidence and Measurement Challenges. PLoS Med. 2014;11(9).
- 387 15. Kutzin J, Sparkes SP. Health systems strengthening , universal health coverage , health  
388 security and resilience. 2016;385(9980):165050.
- 389 16. Id HA, Dickson KS, Setorwu K, Id A, Kissah- K, Kofuor E, et al. Prevalence and factors  
390 associated with health insurance coverage in urban sub-Saharan Africa : Multilevel analyses  
391 of demographic and health survey data. PLoS One [Internet]. 2022;1–14. Available from:  
392 <http://dx.doi.org/10.1371/journal.pone.0264162>
- 393 17. Blanchet NJ, Fink G, Osei-Akoto I. The effect of Ghana’s National Health Insurance Scheme  
394 on health care utilisation. Ghana Med J. 2012;46(2):76–84.
- 395 18. Diop F, Yazbeck A, Bitran R. The impact of alternative cost recovery schemes on access and  
396 equity in niger. Health Policy Plan. 1995;10(3):223–40.

- 397 19. Fiestas Navarrete L, Ghislandi S, Stuckler D, Tediosi F. Inequalities in the benefits of national  
398 health insurance on financial protection from out-of-pocket payments and access to health  
399 services: Cross-sectional evidence from Ghana. *Health Policy Plan.* 2019;34(9):694–705.
- 400 20. Kirigia JM, Sambo LG, Nganda B, Mwabu GM, Chatora R, Mwase T. Determinants of health  
401 insurance ownership among South African women. *BMC Health Serv Res.* 2005;5:1–10.
- 402 21. Kumi-Kyereme A, Amo-Adjei J. Effects of spatial location and household wealth on health  
403 insurance subscription among women in Ghana. *BMC Health Serv Res.* 2013;13(1).
- 404 22. Liu TC, Chen CS. An analysis of private health insurance purchasing decisions with national  
405 health insurance in Taiwan. *Soc Sci Med [Internet].* 2002 [cited 2024 Jan 3];55(5):755–74.  
406 Available from: <https://pubmed.ncbi.nlm.nih.gov/12190269/>
- 407 23. Weldesenbet AB, Kebede SA, Ayele BH, Tusa BS. Health insurance coverage and its  
408 associated factors among reproductive-age women in east africa: A multilevel mixed-effects  
409 generalized linear model. *Clin Outcomes Res.* 2021;13:693–701.
- 410 24. Dowou RK, Atanuriba GA, Adzigbli LA, Balame SK, Tahidu I, Aggrey-korsah J, et al.  
411 Determinants of health insurance coverage among women in Mauritania : a multilevel  
412 analysis. 2024;1–11.
- 413 25. Okedo-alex IN, Uneke CJ. A review of the incidence and determinants of catastrophic health  
414 expenditure in Nigeria : Implications for universal health coverage. 2019;(May):1–18.
- 415 26. Raymond VG, Ndalla MM, Tibenderana JR. Antenatal care access in Tanzania: progress,  
416 challenges, and recommendations for a healthier maternal and child well-being. *Int J Surg*  
417 *Glob Heal.* 2023;6(6):1–2.
- 418 27. Masi S De, Bucagu M, Lawrie T, Oladapo OT. Integrated Person-Centered Health Care for  
419 All Women During Pregnancy Implementing WHO Recommendations on Antenatal Care for

- 420 a Positive Pregnancy Experience. Global journal of health science. GhspjournalOrg  
421 [Internet]. 2017;5(2):197–201. Available from:  
422 <https://www.ghspjournal.org/content/5/2/197.short>
- 423 28. NBS Tanzania. Manufacturing Index. 2023 [cited 2023 Dec 16]. p. 4–7 National Bureau of  
424 Statistics. Available from:  
425 <https://www.nbs.go.tz/index.php/en/%0Ahttp://www.nigerianstat.gov.ng/>
- 426 29. Ministry of Health. Tanzania Ministry of Health [Internet]. 2023 [cited 2023 Dec 16]. Available  
427 from: <https://www.moh.go.tz/>
- 428 30. Ministry of Health Zanzibar. Ministry of Health Zanzibar [Internet]. 2023 [cited 2023 Dec 16].  
429 p. 1–184. Available from: [http://coastalforests.tfcg.org/pubs/Jozani\\_biodiversity\\_inventory](http://coastalforests.tfcg.org/pubs/Jozani_biodiversity_inventory_report_2002.pdf)  
430 [report\\_2002.pdf](http://coastalforests.tfcg.org/pubs/Jozani_biodiversity_inventory_report_2002.pdf)
- 431 31. Macro International Inc. Measure DHS. DHS. 2021 [cited 2023 Dec 16]. The DHS Program -  
432 Protecting the Privacy of DHS Survey Respondents. Available from:  
433 [https://dhsprogram.com/methodology/Protecting-the-Privacy-of-DHS-Survey-](https://dhsprogram.com/methodology/Protecting-the-Privacy-of-DHS-Survey-Respondents.cfm)  
434 [Respondents.cfm](https://dhsprogram.com/methodology/Protecting-the-Privacy-of-DHS-Survey-Respondents.cfm)
- 435 32. Elm E von, Douglas G Altman, Matthias Egger, Stuart J Pocock PCG& JPV for the SI,  
436 Abstract. The Strengthening the Reporting of Observational Studies in Epidemiology  
437 (STROBE) Statement: guidelines for reporting observational studies. Policy Pract.  
438 2014;045120(November):126–40.
- 439 33. Dowou RK, Atanuriba GA, Adzigbli LA, Balame SK, Tahidu I, Aggrey-Korsah J, et al.  
440 Determinants of health insurance coverage among women in Mauritania: a multilevel  
441 analysis. BMC Public Health. 2024;24(1):1–10.
- 442 34. Id HA, Id A aziz S, Agbaglo E, Dowou RK, Kwabena E, Id A, et al. Mixed effects analysis of  
443 factors associated with health insurance coverage among women in sub-Saharan Africa.



- 444 2021;1–15. Available from: <http://dx.doi.org/10.1371/journal.pone.0248411>
- 445 35. Tusa BS, Weldesenbet AB, Kebede SA. Spatial distribution and associated factors of  
446 underweight in Ethiopia : An analysis of Ethiopian demographic and health survey , 2016.  
447 2020; Available from: <http://dx.doi.org/10.1371/journal.pone.0242744>
- 448 36. Mulenga J, Mulenga MC, Musonda KMC, Phiri C. Examining gender differentials and  
449 determinants of private health insurance coverage in Zambia. 2021;1–11.
- 450 37. Aregbeshola BS, Khan SM. Original Article Predictors of Enrolment in the National Health  
451 Insurance Scheme Among Women of Reproductive Age in Nigeria. 2018;7(11):1015–23.
- 452 38. Kwarteng A, Akazili J, Welaga P, Dalinjong PA, Asante KP, Sarpong D, et al. The state of  
453 enrollment on the National Health Insurance Scheme in rural Ghana after eight years of  
454 implementation. 2020;0:1–14.
- 455 39. Rosas ER, Winkler V, Brenner S, Allegri M De. Identifying the determinants of health  
456 insurance coverage among Peruvian women of reproductive age : an assessment based on  
457 the national Peruvian demographic survey of 2017. 2020;4:1–9.
- 458 40. Salari P, Akweongo P, Aikins M, Tediosi F. Determinants of health insurance enrolment in  
459 Ghana : evidence from three national household surveys. 2019;00(August):582–94.
- 460 41. Kebede SA, Liyew AM, Tesema GA, Agegnehu CD, Teshale AB, Alem AZ, et al. Spatial  
461 distribution and associated factors of health insurance coverage in Ethiopia : further analysis  
462 of Ethiopia demographic and health survey , 2016. 2020;1–10.
- 463 42. Baloul I, Dahlui M. Determinants of health insurance enrolment in Sudan : evidence from  
464 Health Utilisation and Expenditure Household Survey 2009. 2014;14(July):6963.
- 465 43. Kebede DB, Belachew YB, Selbana DW, Gizaw AB. Maternal Satisfaction with Antenatal  
466 Care and Associated Factors among Pregnant Women in Hossana Town. Int J Reprod Med.

467 2020;2020:1–8.

468 44. Kazungu JS, Barasa EW. Examining levels , distribution and correlates of health insurance

469 coverage in Kenya. 2017;22(9):1175–85.

470

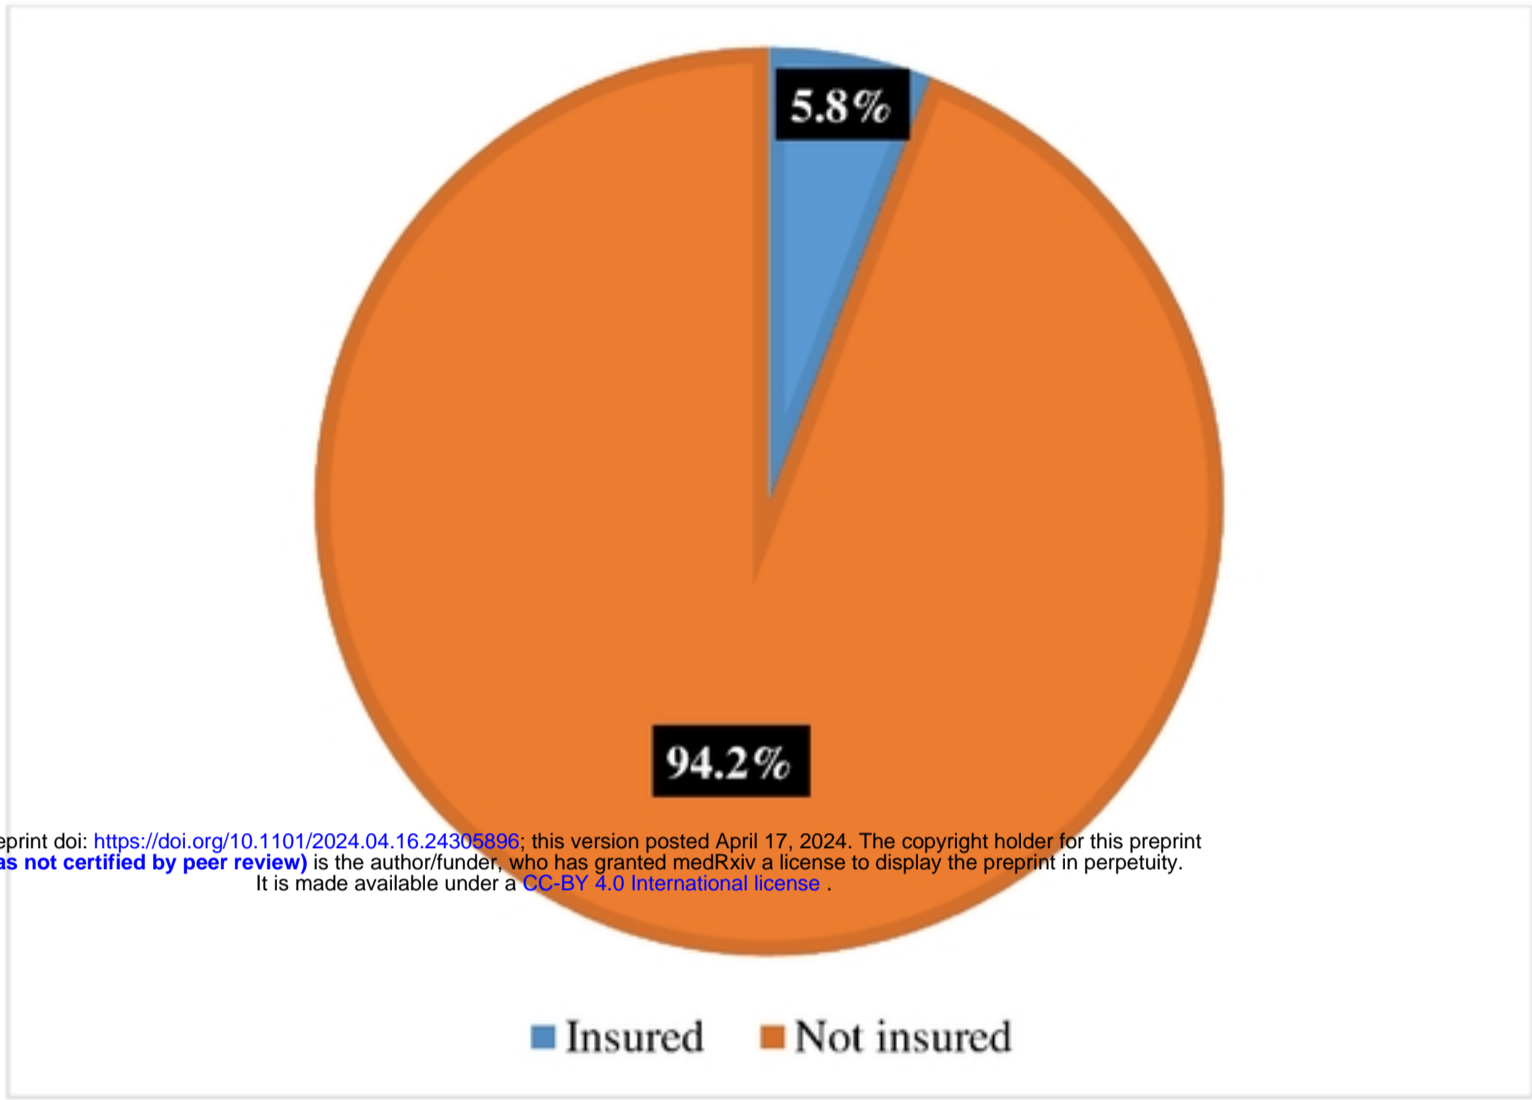

medRxiv preprint doi: <https://doi.org/10.1101/2024.04.16.24305896>; this version posted April 17, 2024. The copyright holder for this preprint (which was not certified by peer review) is the author/funder, who has granted medRxiv a license to display the preprint in perpetuity. It is made available under a [CC-BY 4.0 International license](#).

**Figure1:** Proportion of Health insurance coverage among women of reproductive age

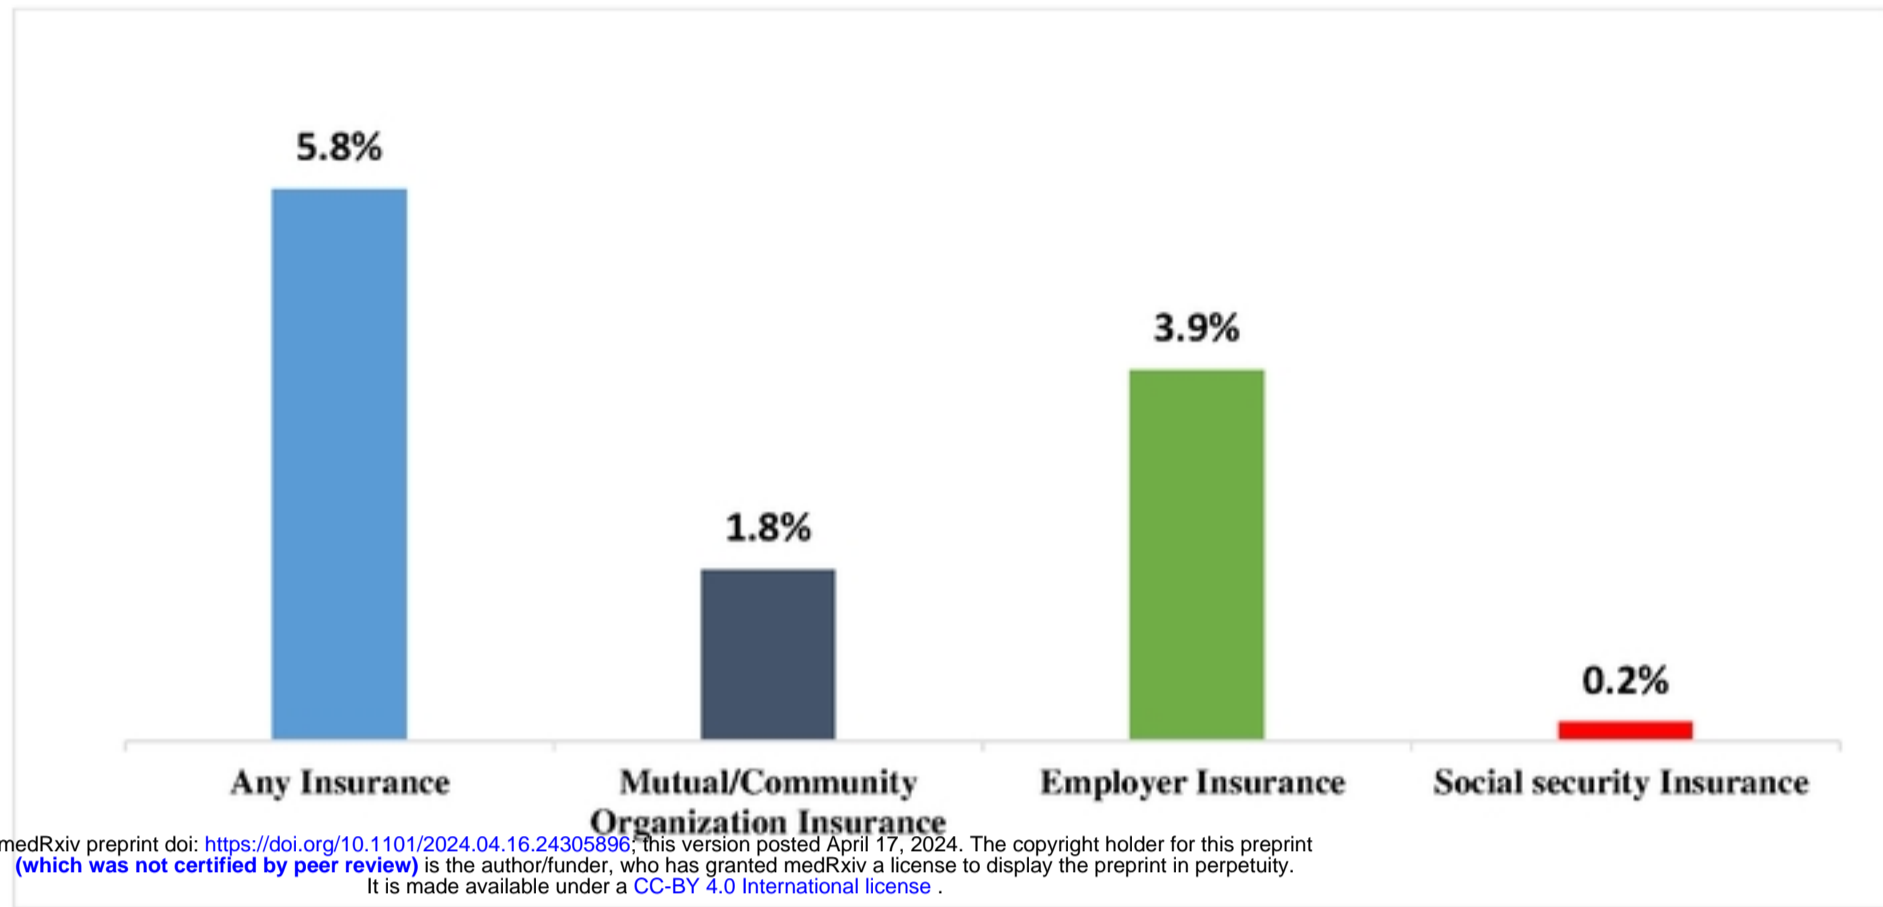

**Figure2:** Specific types of health insurance coverage
